# Supplementary material
Source: publisher figshare collection journal article supplement (https://brill.figshare.com/articles/dataset/_/27940416)
Supplement: Supplementary file 1 [file 1]

RESEARCH ARTICLE

# **Biomanufacturing of a functional microbial phytase in an insect host**

*C. Retief<sup>1</sup>, S. Kumar<sup>1</sup>, K. Tepper<sup>1,3</sup> and M. Maselko<sup>1,2,3\*</sup>*

<sup>1</sup>Applied Biosciences, Macquarie University, Sydney, NSW 2109, Australia; <sup>2</sup>ARC Centre of Excellence in Synthetic Biology, Macquarie University, Sydney, NSW 2019, Australia;

<sup>3</sup>EntoZyme PTY LTD, Sydney, Australia; \*maciej.maselko@mq.edu.au

**Supplementary material**
